# Supplementary figures and images for: Japanese Pharmacists’ Perceptions of Self-Development Skills and Continuing Professional Development
Source: MDPI journal article supplement (doi:10.3390/pharmacy11020073), 2023-04-11

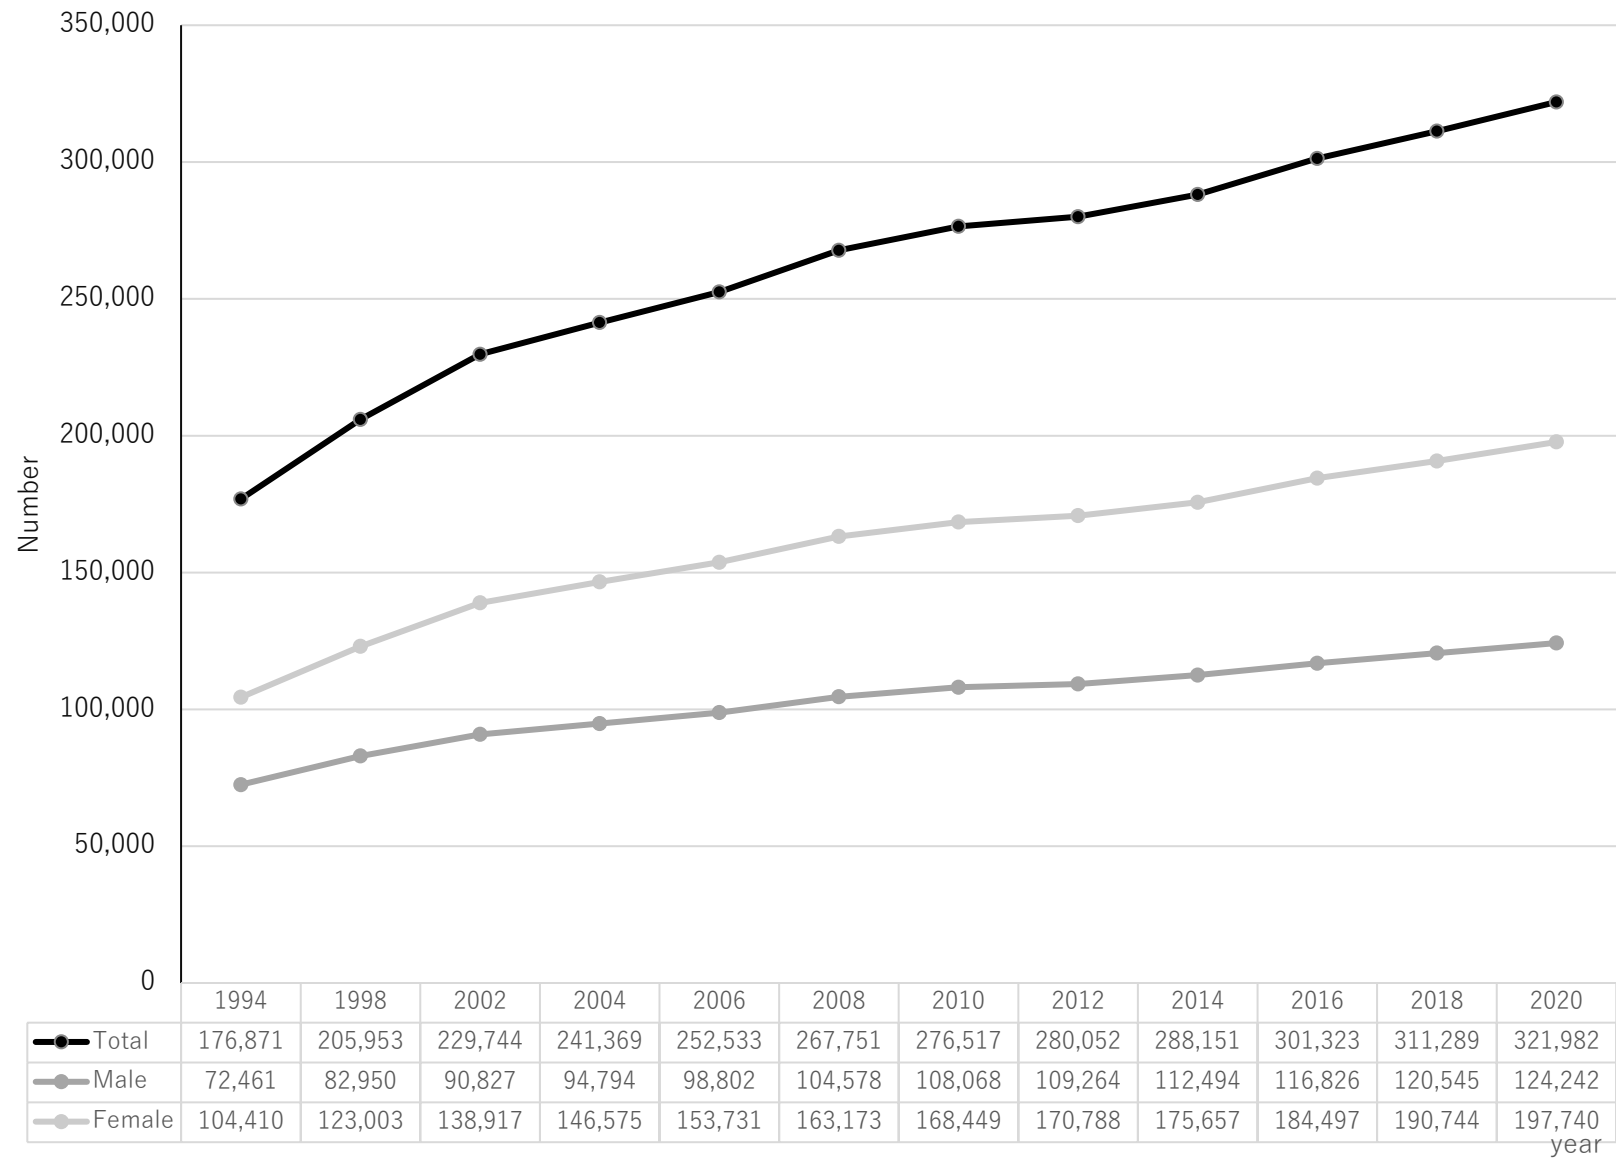

Supplementary Figure S1: Changes in the number of pharmacists (1994-2020)

Supplement: s1 [file s1]
